# Supplementary material for: Impact of Contact Force-Sensing Catheters on Fluoroscopy Time in Interventional Electrophysiology: A European Survey
Source: MDPI journal article supplement (doi:10.3390/jcm11051322), 2022-02-28
Supplement: s1 [file s1]

# Supplementary Materials

**Figure S1.** Impact of CFSCs on fluoroscopy and procedure time with respect to major confounders.

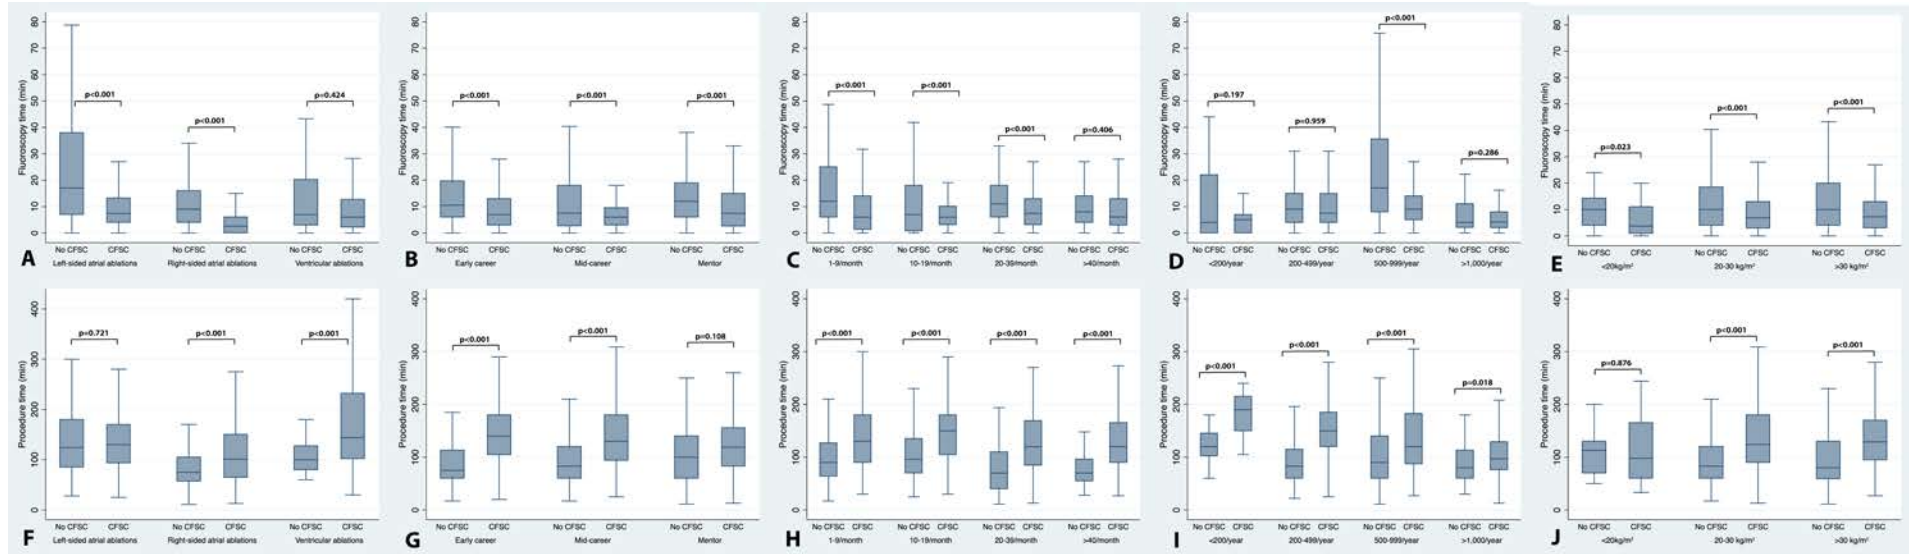

**Figure S1.** Box and whiskers plots depicting the impact of contact force sensing catheters (CFSCs) on fluoroscopy time (upper panels A-E) and procedure time (lower panels F-J) according to type of EP procedure (panels A+F), level of operator experience (panels B+G), operator volume (procedures per month, panels C+H), center volume (ablations per year, panels D+I) as well as the patients' body mass index (BMI, panels E+J). Boxes represent 25<sup>th</sup> and 75<sup>th</sup> percentiles with the median as a solid center line. Whiskers indicate the most extreme values within 1.5 times the interquartile range above the 75<sup>th</sup> percentile and below the 25<sup>th</sup> percentile, respectively. Outside values were not plotted.

**Table S1. Details of contributing countries and centers.**

| Country        | Number of centers | University hospitals | Tertiary care centers | Public hospitals | Overall number of operators | Overall number of procedures | Number of procedures included in this analysis |
|----------------|-------------------|----------------------|-----------------------|------------------|-----------------------------|------------------------------|------------------------------------------------|
| Austria        | 2                 | 1                    | 0                     | 1                | 10                          | 187                          | 153                                            |
| Belgium        | 1                 | 0                    | 1                     | 0                | 2                           | 40                           | 39                                             |
| Croatia        | 2                 | 2                    | 0                     | 0                | 5                           | 87                           | 64                                             |
| France         | 3                 | 2                    | 0                     | 1                | 11                          | 221                          | 150                                            |
| Germany        | 3                 | 3                    | 0                     | 0                | 10                          | 200                          | 176                                            |
| Hungary        | 1                 | 1                    | 0                     | 0                | 5                           | 100                          | 91                                             |
| Italy          | 3                 | 2                    | 0                     | 1                | 12                          | 218                          | 181                                            |
| Poland         | 3                 | 3                    | 0                     | 0                | 13                          | 232                          | 138                                            |
| Portugal       | 1                 | 0                    | 0                     | 1                | 1                           | 20                           | 20                                             |
| Romania        | 1                 | 1                    | 0                     | 0                | 3                           | 60                           | 56                                             |
| Slovenia       | 1                 | 1                    | 0                     | 0                | 4                           | 80                           | 65                                             |
| Spain          | 2                 | 1                    | 0                     | 1                | 12                          | 145                          | 115                                            |
| Ukraine        | 1                 | 1                    | 0                     | 0                | 5                           | 100                          | 92                                             |
| United Kingdom | 1                 | 0                    | 1                     | 0                | 5                           | 98                           | 85                                             |
| Overall        | 25                | 18                   | 2                     | 5                | 98                          | 1,788                        | 1,425                                          |

**Table S2A. Overview of the number of different EP procedures per group as well as use of a 3D mapping system and/or contact force sensing catheters.**

| Procedure type                 | Overall number of procedures* | 3D vs. no 3D*  | CFSC vs. no CFSC* | 3D + CFSC* | 3D + no CFSC* | No 3D + CFSC* | No 3D + no CFSC* |
|--------------------------------|-------------------------------|----------------|-------------------|------------|---------------|---------------|------------------|
| <b>Group 1</b>                 | <b>646</b>                    | <b>237/409</b> | <b>120/526</b>    | <b>104</b> | <b>133</b>    | <b>16</b>     | <b>393</b>       |
| AVNRT                          | 267                           | 70/197         | 27/240            | 19         | 51            | 8             | 189              |
| Atrial flutter                 | 301                           | 121/180        | 63/238            | 56         | 65            | 7             | 173              |
| RA AT                          | 38                            | 27/11          | 20/18             | 20         | 7             | 0             | 11               |
| RA AP                          | 40                            | 19/21          | 10/30             | 9          | 10            | 1             | 20               |
| <b>Group 2</b>                 | <b>622</b>                    | <b>576/46</b>  | <b>480/142</b>    | <b>477</b> | <b>99</b>     | <b>3</b>      | <b>43</b>        |
| PVI (RF) w/o additional lines  | 393                           | 393/0          | 352/41            | 352        | 41            | 0             | 0                |
| PVI (RF) with additional lines | 122                           | 122/0          | 95/27             | 95         | 27            | 0             | 0                |
| All PVIs (RF)                  | 515                           | 515/0          | 447/68            | 447        | 68            | 0             | 0                |
| LA AT                          | 42                            | 35/7           | 23/19             | 22         | 13            | 1             | 6                |
| LA AP                          | 65                            | 26/39          | 10/55             | 8          | 18            | 2             | 37               |
| <b>Group 3</b>                 | <b>157</b>                    | <b>148/9</b>   | <b>125/32</b>     | <b>125</b> | <b>23</b>     | <b>0</b>      | <b>9</b>         |
| PVC                            | 91                            | 82/9           | 69/22             | 69         | 13            | 0             | 9                |
| VT                             | 66                            | 66/0           | 56/10             | 56         | 10            | 0             | 0                |

Group 1: right-sided atrial EP procedures, group 2: left-sided atrial EP procedures, group 3: ventricular EP procedures. 3D = three-dimensional, CFSC = contact force sensing catheter, PVI = pulmonary vein isolation, RF = radiofrequency energy source, LA = left atrial, AT = atrial tachycardia, AP = accessory pathway, AVNRT = AV nodal reentrant tachycardia, RA = right atrial, PVC = premature ventricular contraction, VT = ventricular tachycardia. \*Absolute numbers.

**Table S2B. Fluoroscopy times with and without the use of contact force sensing ablation catheters for different EP procedures and according to the use of a 3D mapping system.**

|                                |                           | Entire cohort                      |                                   |                      | Procedures using 3D mapping systems only |                                   |                      | Procedures w/o the use of 3D mapping systems only |                                   |                      |
|--------------------------------|---------------------------|------------------------------------|-----------------------------------|----------------------|------------------------------------------|-----------------------------------|----------------------|---------------------------------------------------|-----------------------------------|----------------------|
| Procedure type                 | Fluoro time <sup>†</sup>  | Fluoro time with CFSC <sup>†</sup> | Fluoro time w/o CFSC <sup>†</sup> | p-value <sup>‡</sup> | Fluoro time with CFSC <sup>†</sup>       | Fluoro time w/o CFSC <sup>†</sup> | p-value <sup>‡</sup> | Fluoro time with CFSC <sup>†</sup>                | Fluoro time w/o CFSC <sup>†</sup> | p-value <sup>‡</sup> |
| <b>Group 1</b>                 | <b>7.2<br/>(2.6-15.0)</b> | <b>2.6<br/>(0.0-6.0)</b>           | <b>9.0<br/>(4.0-16.0)</b>         | <b>&lt;0.001</b>     | <b>2.0<br/>(0.0-5.7)</b>                 | <b>2.0<br/>(0.0-7.0)</b>          | <b>0.473</b>         | <b>5.8<br/>(3.3-9.2)</b>                          | <b>11.0<br/>(6.0-18.0)</b>        | <b>&lt;0.001</b>     |
| AVNRT                          | 8.0<br>(3.0-13.3)         | 2.6<br>(0.0-5.6)                   | 8.8<br>(4.0-14.7)                 | <0.001               | 1.1<br>(0.0-3.7)                         | 2.0<br>(0.0-7.0)                  | 0.044                | 6.9<br>(4.5-10.3)                                 | 10.0<br>(6.0-16.0)                | 0.012                |
| Atrial flutter                 | 6.0<br>(2.0-15.0)         | 2.0<br>(0.0-6.0)                   | 9.0<br>(3.2-16.0)                 | <0.001               | 2.0<br>(0.0-5.3)                         | 2.0<br>(0.0-4.0)                  | 0.624                | 4.6<br>(3.2-6.3)                                  | 11.0<br>(6.0-20.0)                | 0.064                |
| RA AT                          | 7.1<br>(4.0-20.0)         | 5.2<br>(1.0-16.0)                  | 13.3<br>(6.0-22.0)                | 0.082                | 5.2<br>(1.0-16.0)                        | 6.0<br>(0.6-8.0)                  | 0.160                | n/a*                                              | 22.0<br>(14.0-37.9)               | n/a*                 |
| RA AP                          | 8.5<br>(2.5-19.6)         | 1.0<br>(0.0-7.0)                   | 10.5<br>(4.0-22.0)                | <0.001               | 0.0<br>(0.0-3.0)                         | 4.5<br>(0.0-8.0)                  | 0.171                | 9.45**                                            | 17.6<br>(9.0-32.4)                | n/a*                 |
| <b>Group 2</b>                 | <b>8.6<br/>(4.6-16.8)</b> | <b>7.4<br/>(4.0-13.2)</b>          | <b>17.0<br/>(7.0-38.0)</b>        | <b>&lt;0.001</b>     | <b>7.4<br/>(4.0-13.6)</b>                | <b>16.4<br/>(8.0-41.0)</b>        | <b>&lt;0.001</b>     | <b>11.1<br/>(5.0-12.0)</b>                        | <b>19.1<br/>(6.2-25.7)</b>        | <b>0.009</b>         |
| PVI (RF) w/o additional lines  | 8.0<br>(4.2-14.0)         | 7.2<br>(4.0-13.0)                  | 19.0<br>(11.0-33.7)               | <0.001               | 7.2<br>(4.0-13.0)                        | 19.0<br>(11.0-33.7)               | <0.001               | n/a*                                              | n/a*                              | n/a*                 |
| PVI (RF) with additional lines | 10.0<br>(5.0-20.0)        | 7.3<br>(5.0-14.0)                  | 45.3<br>(34.9-61.8)               | <0.001               | 7.3<br>(5.0-14.0)                        | 45.3<br>(34.9-61.8)               | <0.001               | n/a*                                              | n/a*                              | n/a*                 |
| All PVIs (RF)                  | 8.4<br>(4.5-15.5)         | 7.2<br>(4.0-13.0)                  | 27.4<br>(13.5-46.8)               | <0.001               | 7.2<br>(4.0-13.0)                        | 27.4<br>(13.5-46.8)               | <0.001               | n/a*                                              | n/a*                              | n/a*                 |
| LA AT                          | 9.0<br>(6.0-20.4)         | 8.5<br>(6.0-22.6)                  | 10.0<br>(6.0-20.4)                | 0.293                | 8.3<br>(6.0-22.6)                        | 7.0<br>(6.0-16.4)                 | 0.586                | 12.0**                                            | 21.9<br>(11.2-27.7)               | n/a*                 |
| LA AP                          | 8.5<br>(4.0-21.0)         | 6.0<br>(4.0-11.1)                  | 10.2<br>(4.0-21.7)                | 0.055                | 5.5<br>(2.2-12.5)                        | 5.4<br>(0.5-8.0)                  | 0.519                | 8.1<br>(5.0-11.1)                                 | 18.5<br>(6.2-24.8)                | 0.063                |
| <b>Group 3</b>                 | <b>6.2<br/>(2.5-14.0)</b> | <b>6.0<br/>(2.2-12.7)</b>          | <b>7.0<br/>(3.0-20.3)</b>         | <b>0.424</b>         | <b>6.0<br/>(2.2-12.7)</b>                | <b>4.0<br/>(2.5-20.0)</b>         | <b>0.632</b>         | <b>n/a*</b>                                       | <b>10.0<br/>(7.5-20.6)</b>        | <b>n/a*</b>          |
| PVC                            | 5.0<br>(2.0-8.0)          | 4.0<br>(1.0-7.0)                   | 7.8<br>(3.0-20.0)                 | 0.016                | 4.0<br>(1.0-7.0)                         | 5.2<br>(2.5-19.0)                 | 0.193                | n/a*                                              | 10.0<br>(7.5-20.6)                | n/a*                 |
| VT                             | 9.9<br>(4.0-23.0)         | 10.0<br>(5.0-23.0)                 | 4.0<br>(3.0-35.6)                 | 0.886                | 10.0<br>(5.0-23.0)                       | 4.0<br>(3.0-35.6)                 | 0.886                | n/a*                                              | n/a*                              | n/a*                 |

Group 1: right-sided atrial EP procedures, group 2: left-sided atrial EP procedures, group 3: ventricular EP procedures. 3D = three-dimensional, CFSC = contact force sensing catheter, PVI = pulmonary vein isolation, RF = radiofrequency energy source, LA = left atrial, AT = atrial tachycardia, AP = accessory pathway, AVNRT = AV nodal reentrant tachycardia, RA = right atrial, PVC = premature ventricular contraction, VT = ventricular tachycardia. †Data are presented as medians with interquartile ranges. ‡Student's t-test with Welch modification. w/o = without, CFSC = contact force sensing catheter. \*A group size of 0 observations (or only 1\*\* observation) precludes calculation of a p-value.

**Table S2C. Procedure times with and without the use of contact force sensing ablation catheters for different EP procedures and according to the use of a 3D mapping system.**

|                                |                                     | Entire cohort                        |                                     |                      | Procedures using 3D mapping systems only |                                     |                      | Procedures w/o the use of 3D mapping systems only |                                     |                      |
|--------------------------------|-------------------------------------|--------------------------------------|-------------------------------------|----------------------|------------------------------------------|-------------------------------------|----------------------|---------------------------------------------------|-------------------------------------|----------------------|
| Procedure type                 | Proced. time <sup>†</sup>           | Proced. time with CFSC <sup>†</sup>  | Proced. time w/o CFSC <sup>†</sup>  | p-value <sup>‡</sup> | Proced. time with CFSC <sup>†</sup>      | Proced. time w/o CFSC <sup>†</sup>  | p-value <sup>‡</sup> | Proced. time with CFSC <sup>†</sup>               | Proced. time w/o CFSC <sup>†</sup>  | p-value <sup>‡</sup> |
| <b>Group 1</b>                 | <b>78.5</b><br><b>(59.0-115.5)</b>  | <b>101.0</b><br><b>(65.0-150.0)</b>  | <b>75.0</b><br><b>(57.0-105.0)</b>  | <b>&lt;0.001</b>     | <b>111.0</b><br><b>(70.0-155.0)</b>      | <b>90.0</b><br><b>(60.0-118.0)</b>  | <b>0.002</b>         | <b>68.0</b><br><b>(57.0-81.0)</b>                 | <b>72.0</b><br><b>(56.0-96.0)</b>   | <b>0.172</b>         |
| AVNRT                          | 78.0<br>(60.0-110.0)                | 80.0<br>(66.0-123.0)                 | 76.0<br>(60.0-110.0)                | 0.253                | 106.0<br>(70.0-150.0)                    | 95.0<br>(70.0-123.0)                | 0.936                | 72.5<br>(64.5-99.0)                               | 74.5<br>(56.5-100.0)                | 0.697                |
| Atrial flutter                 | 70.0<br>(55.0-103.0)                | 98.0<br>(60.0-150.0)                 | 70.0<br>(52.0-95.0)                 | <0.001               | 118.0<br>(65.0-160.0)                    | 70.0<br>(45.0-103.0)                | <0.001               | 59.0<br>(39.0-82.0)                               | 70.0<br>(55.0-91.5)                 | 0.139                |
| RA AT                          | 120.0<br>(90.0-140.0)               | 110.0<br>(71.0-138.0)                | 120.0<br>(93.0-170.0)               | 0.402                | 110.0<br>(71.0-138.0)                    | 120.0<br>(100.0-160.0)              | 0.476                | n/a*                                              | 120.0<br>(93.0-180.0)               | n/a*                 |
| RA AP                          | 90.0<br>(60.0-155.0)                | 162.5<br>(80.0-190.0)                | 86.5<br>(40.0-120.0)                | 0.025                | 165.0<br>(150.0-190.0)                   | 105.0<br>(70.0-130.0)               | 0.154                | 80.0**                                            | 81.5<br>(38.5-120.0)                | n/a*                 |
| <b>Group 2</b>                 | <b>128.0</b><br><b>(92.0-177.0)</b> | <b>130.0</b><br><b>(93.5-170.0)</b>  | <b>124.0</b><br><b>(85.0-180.0)</b> | <b>0.721</b>         | <b>130.0</b><br><b>(94.0-170.0)</b>      | <b>135.0</b><br><b>(90.0-200.0)</b> | <b>0.377</b>         | <b>120.0</b><br><b>(25.0-123.0)</b>               | <b>110.0</b><br><b>(70.0-130.0)</b> | <b>0.528</b>         |
| PVI (RF) w/o additional lines  | 124.0<br>(92.0-167.0)               | 123.0<br>(90.0-162.5)                | 135.0<br>(100.0-180.0)              | 0.122                | 123.0<br>(90.0-162.5)                    | 135.0<br>(100.0-180.0)              | 0.122                | n/a*                                              | n/a*                                | n/a*                 |
| PVI (RF) with additional lines | 169.5<br>(130.0-210.0)              | 153.0<br>(127.0-200.0)               | 210.0<br>(180.0-240.0)              | 0.001                | 153.0<br>(127.0-200.0)                   | 210.0<br>(180.0-240.0)              | 0.001                | n/a*                                              | n/a*                                | n/a*                 |
| All PVIs (RF)                  | 135.0<br>(97.0-180.0)               | 130.0<br>(95.0-172.0)                | 180.0<br>(115.0-210.0)              | <0.001               | 130.0<br>(95.0-172.0)                    | 180.0<br>(115.0-210.0)              | <0.001               | n/a*                                              | n/a*                                | n/a*                 |
| LA AT                          | 114.5<br>(60.0-180.0)               | 117.0<br>(70.0-215.0)                | 110.0<br>(36.0-177.0)               | 0.306                | 117.5<br>(75.0-215.0)                    | 40.0<br>(36.0-177.0)                | 0.243                | 25.0**                                            | 125.0<br>(70.0-150.0)               | n/a*                 |
| LA AP                          | 94.5<br>(65.0-121.5)                | 107.5<br>(70.0-123.0)                | 92.0<br>(65.0-120.0)                | 0.978                | 102.5<br>(63.0-130.0)                    | 70.0<br>(60.0-90.0)                 | 0.418                | 121.5<br>(120.0-123.0)                            | 108.5<br>(75.0-127.5)               | 0.227                |
| <b>Group 3</b>                 | <b>130.0</b><br><b>(92.0-261.5)</b> | <b>144.0</b><br><b>(102.5-232.0)</b> | <b>100.0</b><br><b>(80.0-127.5)</b> | <b>&lt;0.001</b>     | <b>144.0</b><br><b>(102.5-232.0)</b>     | <b>115.0</b><br><b>(80.0-140.0)</b> | <b>0.012</b>         | <b>n/a*</b>                                       | <b>100.0</b><br><b>(80.0-110.0)</b> | <b>n/a*</b>          |
| PVC                            | 110.5<br>(80.0-159.0)               | 120.0<br>(83.5-180.0)                | 90.0<br>(75.0-115.0)                | <0.001               | 120.0<br>(83.5-180.0)                    | 90.0<br>(75.0-115.0)                | 0.001                | n/a*                                              | 100.0<br>(80.0-110.0)               | n/a*                 |
| VT                             | 180.0<br>(123.0-260.0)              | 182.5<br>(130.0-271.5)               | 135.0<br>(120.0-225.0)              | 0.199                | 182.5<br>(130.0-271.5)                   | 135.0<br>(120.0-225.0)              | 0.199                | n/a*                                              | n/a*                                | n/a*                 |

Group 1: right-sided atrial EP procedures, group 2: left-sided atrial EP procedures, group 3: ventricular EP procedures. Proced. = procedure, 3D = three-dimensional, CFSC = contact force sensing catheter, PVI = pulmonary vein isolation, RF = radiofrequency energy source, LA = left atrial, AT = atrial tachycardia, AP = accessory pathway, AVNRT = AV nodal reentrant tachycardia, RA = right

atrial, PVC = premature ventricular contraction, VT = ventricular tachycardia. †Data are presented as medians with interquartile ranges. \*Student's t-test with Welch modification. w/o = without, CFSC = contact force sensing catheter. \*A group size of 0 observations (or only 1\*\* observation) precludes calculation of a p-value.
